# Supplementary material
Source: PubMed Central journal article supplement (PMC3529792)

## **SUPPLEMENTAL MATERIAL:**

### **Figure S1. Normal CTL effector function in *Def6*<sup>-/-</sup> OT-I CD8<sup>+</sup> T cells.**

**A**, Naïve WT B6 (CD45.2<sup>+</sup>) mice received 5000 OT-I WT (CD45.1<sup>+</sup>) or *Def6*<sup>-/-</sup> OT-I (CD45.1<sup>+</sup>) CD8<sup>+</sup> T cells. One day later, mice were challenged with 5 x 10<sup>6</sup> Act-mOVA/K<sup>b/-</sup> splenocytes. **A**, Data are presented as the frequency of expanded OT-I cells (CD45.1<sup>+</sup> H-2K<sup>b</sup>-OVA tetramer<sup>+</sup>) generated in WT recipient mice (first and third panels from left) and % of specific killing of specific target cells pulsed with OVA<sub>257-264</sub> and control, irrelevant target cells (Ski9) (second and fourth panels from left). **B**, *In vitro* killing of target cells by WT and KO OT-I CD8<sup>+</sup> T cells at the indicated effector:target (E:T) ratios was evaluated by measuring <sup>3</sup>H retention in target cells, as described in Materials and Methods. Data are presented as percent ± SD of specific cytotoxicity of quadruplicate samples and are representative of three independent experiments. **C**, Cell surface expression of CD107a was analyzed in CD8<sup>+</sup> OT-I recovered from immunized mice and restimulated *in vitro* with OVA peptide in the presence of Brefeldin A for 5 h.

### **Figure S2. Impaired secondary expansion of *Def6*<sup>-/-</sup> CD8<sup>+</sup> T cells in response to LM-OVA infection is rescued by constitutive *Cdc42* or *NFAT1* activation.**

Naive WT B6 (CD45.1/2<sup>+</sup>) mice (n=5) received 50 WT OT-I (CD45.1<sup>+</sup>) and 50 *Def6*<sup>-/-</sup> OT-I (CD45.2<sup>+</sup>) CD8<sup>+</sup> T cells. One day later, the mice were challenged with 5x10<sup>6</sup> Act-mOVA/K<sup>b/-</sup> splenocytes. On day 7, the mice were rechallenged with 1 x 10<sup>7</sup> cfu of Act-A<sup>-</sup> Lm-OVA followed by analysis on day 12. **A**, Representative FACS plots of WT and KO OT-I CD8<sup>+</sup> T cell frequency in peripheral blood. **B**, Average ratio of WT to KO OT-I CD8<sup>+</sup> T cells per mouse. The WT/KO ratio in non-immunized animals is set at 1. **C**, Average absolute numbers ± SEM of WT and KO OT-I CD8<sup>+</sup> T cells in spleens from recipient mice on day 12. **D**, Average expression ±

SEM of T-Bet and Eomes by WT and KO OT-I CD8<sup>+</sup> T cells 7 days after immunization. Data are representative of at least three independent experiments. **E**, Average frequency  $\pm$  SEM of OT-I cells that express KLRG-1 and CD127 in the peripheral blood. **F**, Average frequency  $\pm$  SEM of WT and KO OT-I CD8<sup>+</sup> T cells producing IFN- $\gamma$  alone (IFN- $\gamma$ <sup>+</sup>TNF- $\alpha$ <sup>-</sup>) or both IFN- $\gamma$  and TNF- $\alpha$  (IFN- $\gamma$ <sup>+</sup>TNF- $\alpha$ <sup>+</sup>) among total splenocytes determined by ICS 12 days post-immunization. **G**, The NFAT1<sup>CA</sup> $\Delta$ dimer mutant protein can constitutively transactivate an NFAT-responsive reporter luciferase construct. Jurkat-TAg cells were cotransfected with an empty control vector (empty vector; 10  $\mu$ g) or with an NFAT<sup>CA</sup> $\Delta$ dimer-expressing NFAT<sup>CA</sup> $\Delta$ dimer, together with NFAT-luciferase reporter (10  $\mu$ g) plus a  $\beta$ -Gal (5  $\mu$ g) reporter gene. Cells were left unstimulated for 16 hr and normalized luciferase activity (mean  $\pm$  SD) was measured in triplicates. NFAT expression was detected using an anti-HA Ab, and actin immunoblotting served as a loading control. **H-I**, Constitutive Cdc42 or NFAT1 activation rescue secondary expansion of *Def6*<sup>-/-</sup> CD8<sup>+</sup> T cells. Retrogenic mice generation, adoptive transfer, priming with Act-mOVA/K<sup>b/-</sup> splenocytes and challenge with LM-OVA were performed as in **Fig. 5**. Analysis was performed 5 days after LM-OVA challenge. **H**, Average frequency (mean  $\pm$  SEM, n=4-5) of WT and KO OT-I CD8<sup>+</sup> T cells among peripheral blood CD8<sup>+</sup> cells. **I**, Average ratio of WT to KO OT-I CD8<sup>+</sup> T cells. The ratio in non-immunized animals is set at 1.

**Figure S3. *Def6* deficiency results in defective CD8<sup>+</sup> T cell response to *Listeria monocytogenes* infection.**

Fifty naïve WT (CD45.1<sup>+</sup>) and *Def6*<sup>-/-</sup> (KO; CD45.2<sup>+</sup>) OT-I CD8<sup>+</sup> T cells were adoptively co-transferred into CD45.1/2<sup>+</sup> B6 recipient that were immunized one day later with 3000 cfu OVA-expressing *Listeria monocytogenes* (LM-OVA) followed by analysis at day 7 (primary), at day 49 (memory), and at day 54 (secondary) in mice that had received 1x10<sup>7</sup> cfu OVA-expressing *Listeria monocytogenes* Act A deficient rechallenge 5 days earlier. Frequency of WT and KO

OT-I CD8<sup>+</sup> T cells in the blood from recipient mice (n=6) is shown. \*P<0.05, \*\*\*P<0.0005 (two-tailed unpaired *t*-test).

**Figure S4. Defective IL-2 production of Def6<sup>-/-</sup> CD8<sup>+</sup> T cells upon CD3/CD28 stimulation *in vitro*.**

**A**, Purified peripheral CD8<sup>+</sup> T cells from WT and Def6<sup>-/-</sup> (KO) mice were stimulated with the indicated concentrations of plate-coated anti-CD3 plus soluble CD28 mAbs for 40 hours. **A**, [<sup>3</sup>H]thymidine was added for the final 16 hours, and uptake was measured. **B**, CD8<sup>+</sup> T cells were stimulated for 24 hours as in **A**, and IL-2 production was measured by an ELISA. **C**, CD8<sup>+</sup> T cells from WT and KO mice were stimulated with the indicated concentrations of anti-CD3 plus 2.5µg/ml anti-CD28 mAbs for 16 hours, and analyzed by flow cytometry for CD25 and CD69 expression. Results are expressed as mean ± SD. Statistical differences were determined as in **Figure 1**. \*\*\*P<0.0005 (two-tailed unpaired *t*-test). Data are representative of three independent experiments.

**A**

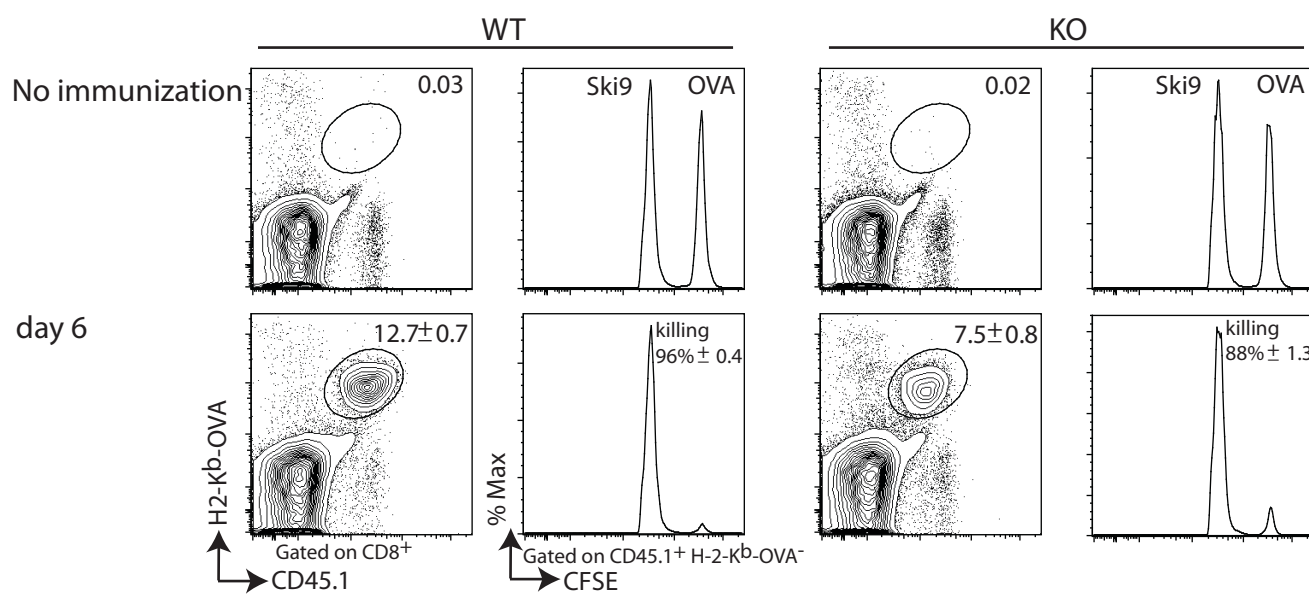

**B**

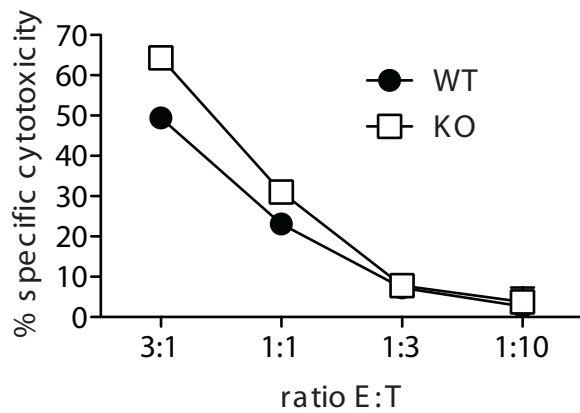

**C**

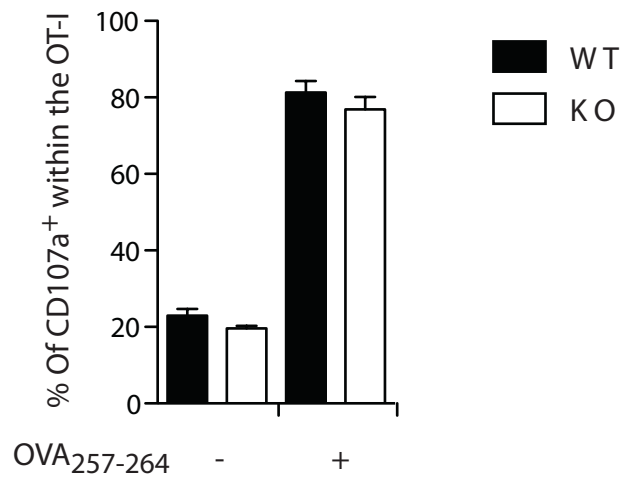

Figure S2, Feau et al.

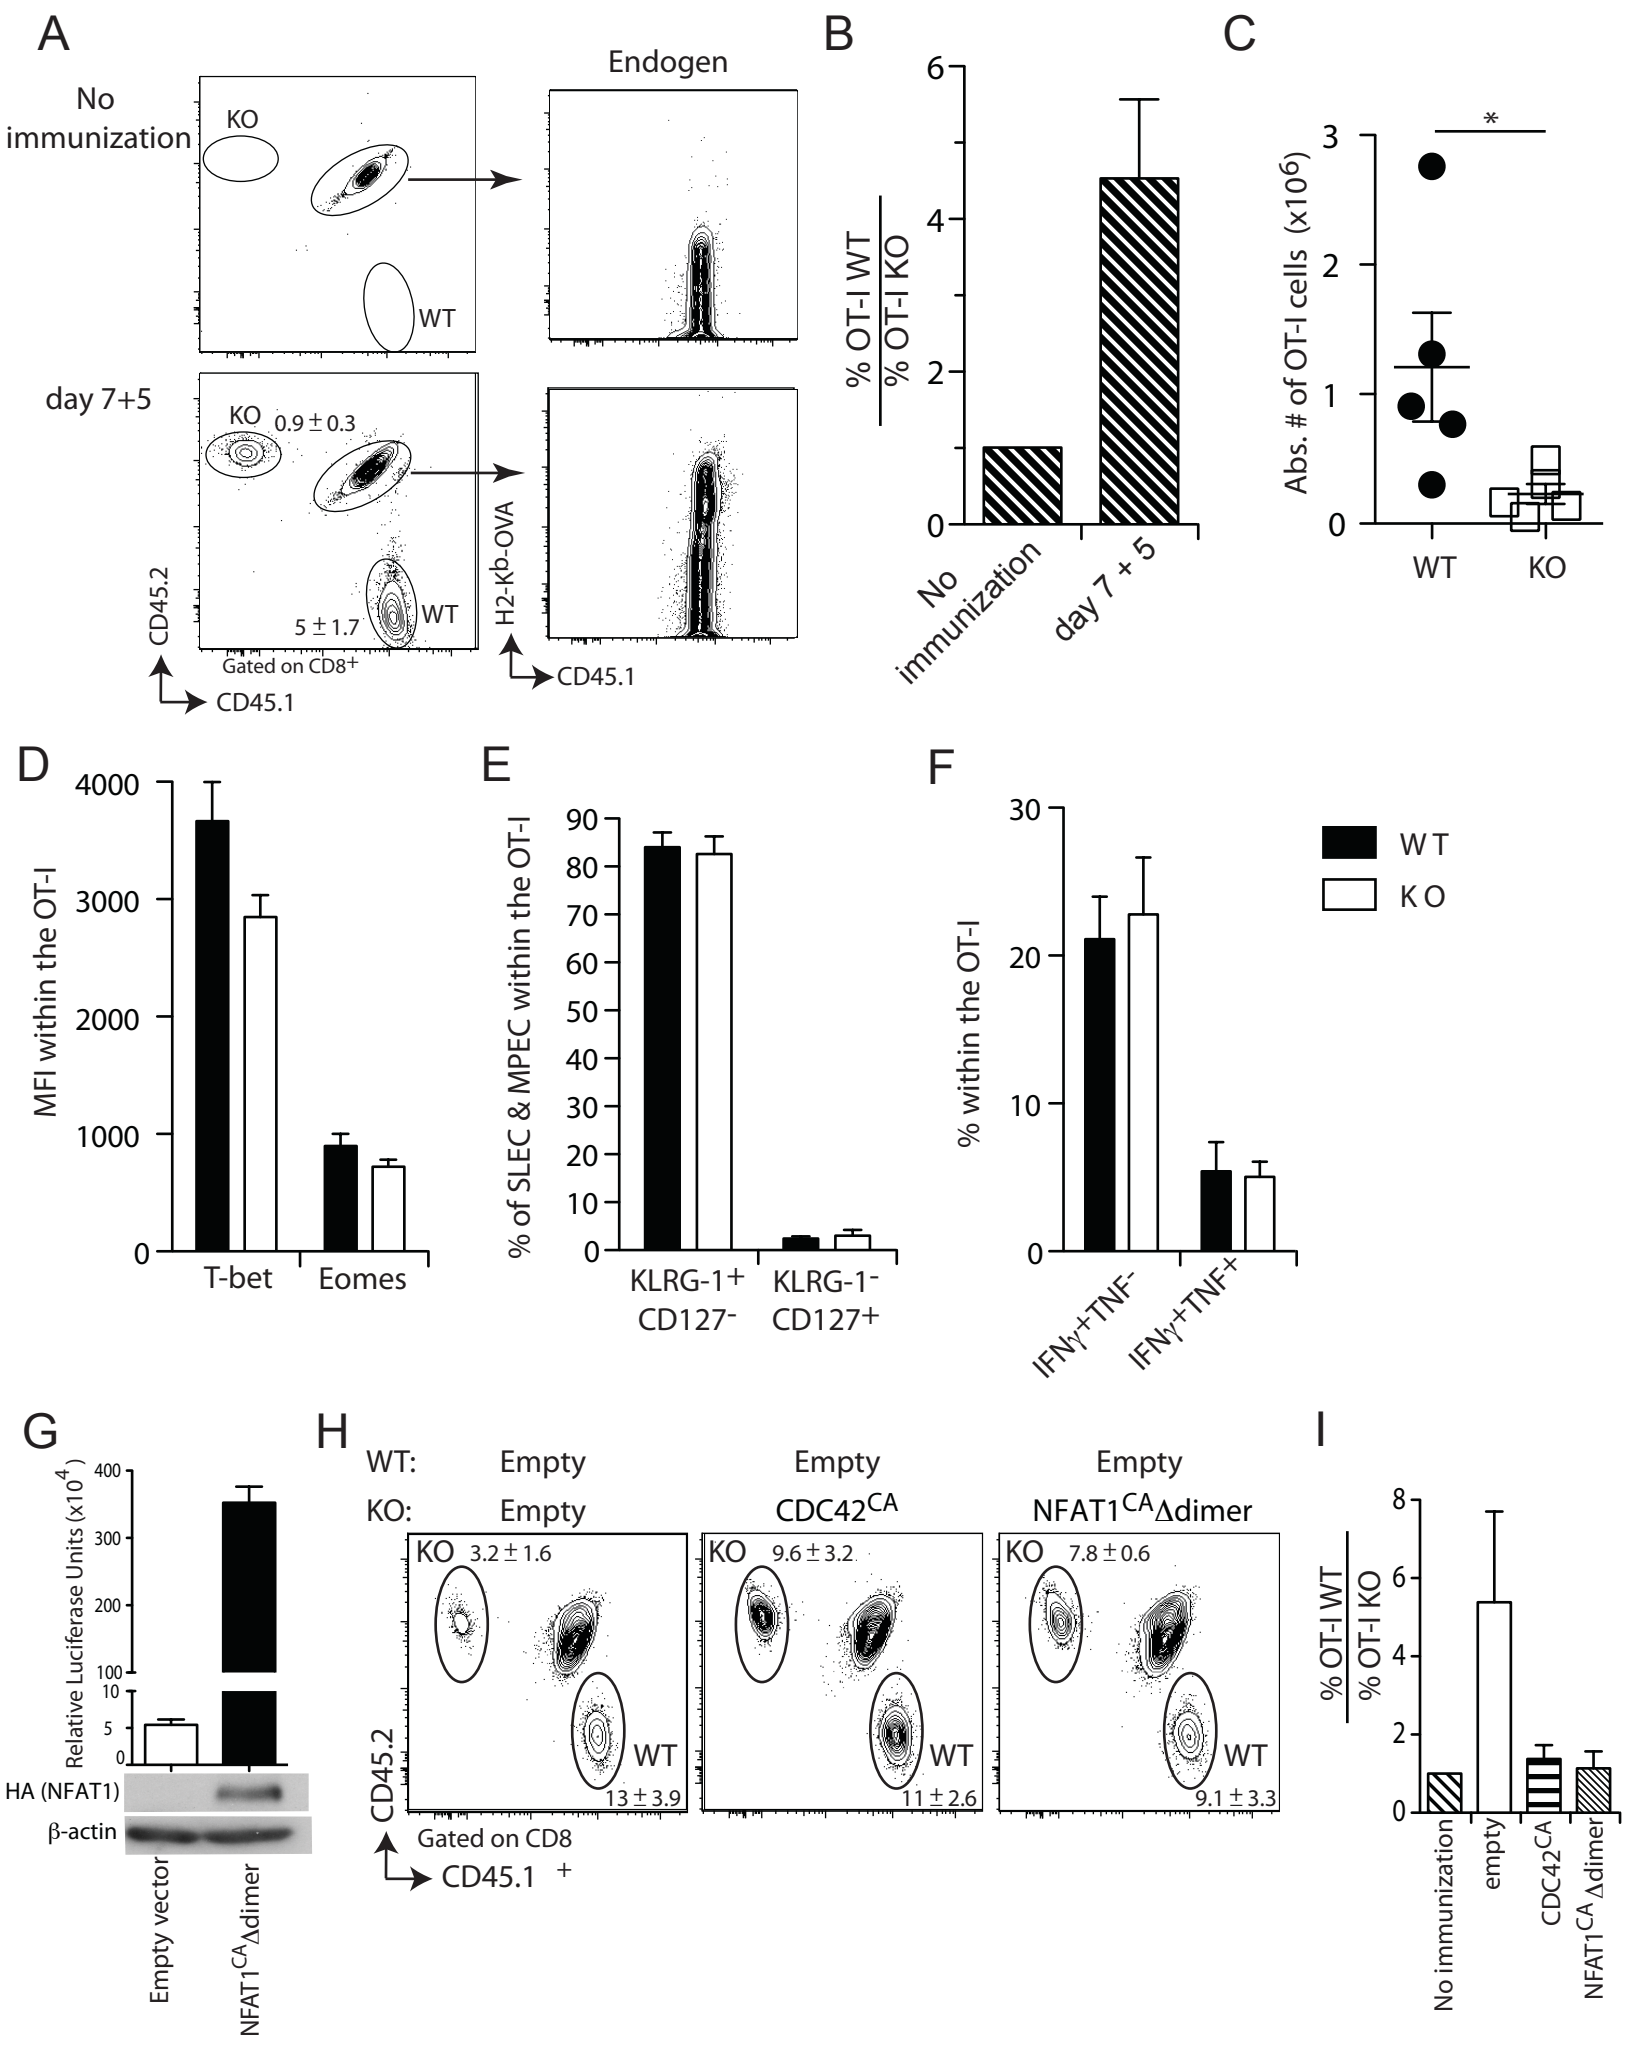

Figure S3, Feau et al.

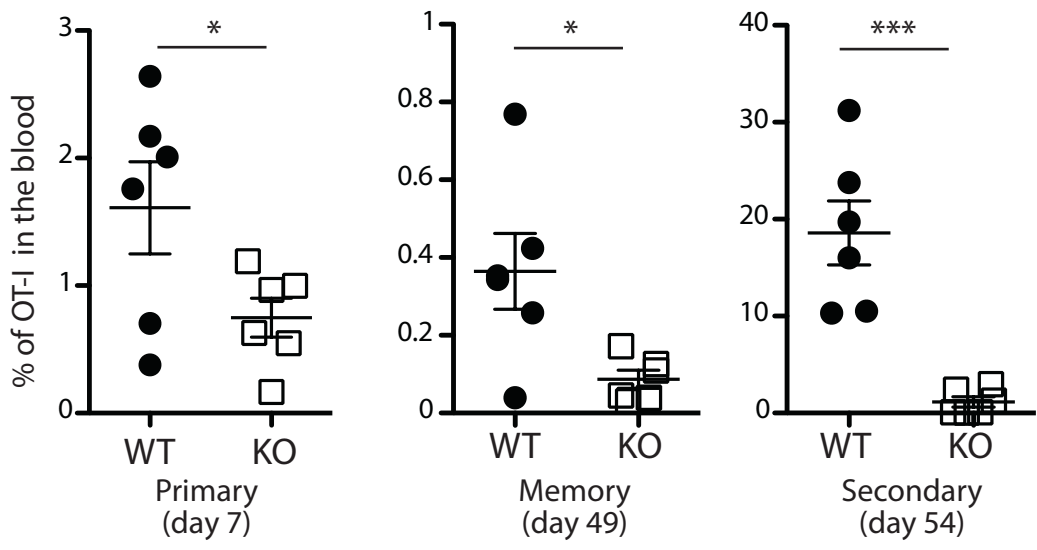

**A**

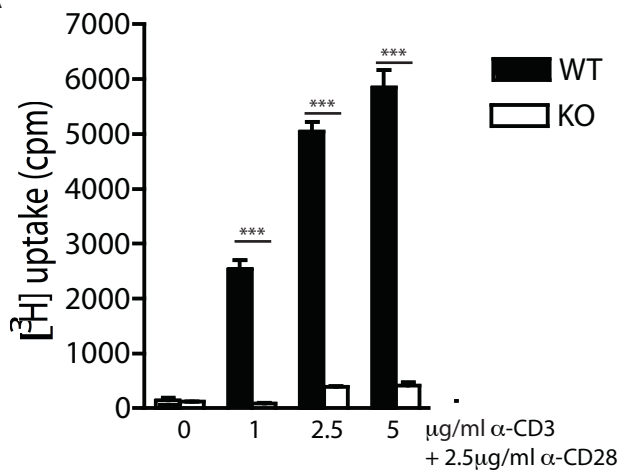

**B**

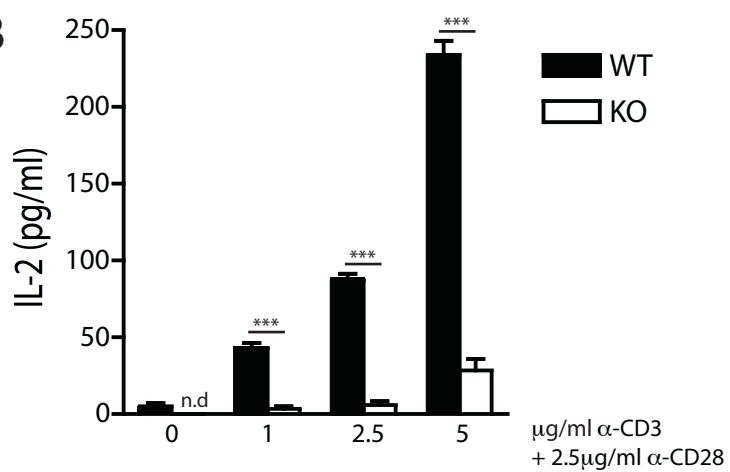

**C**

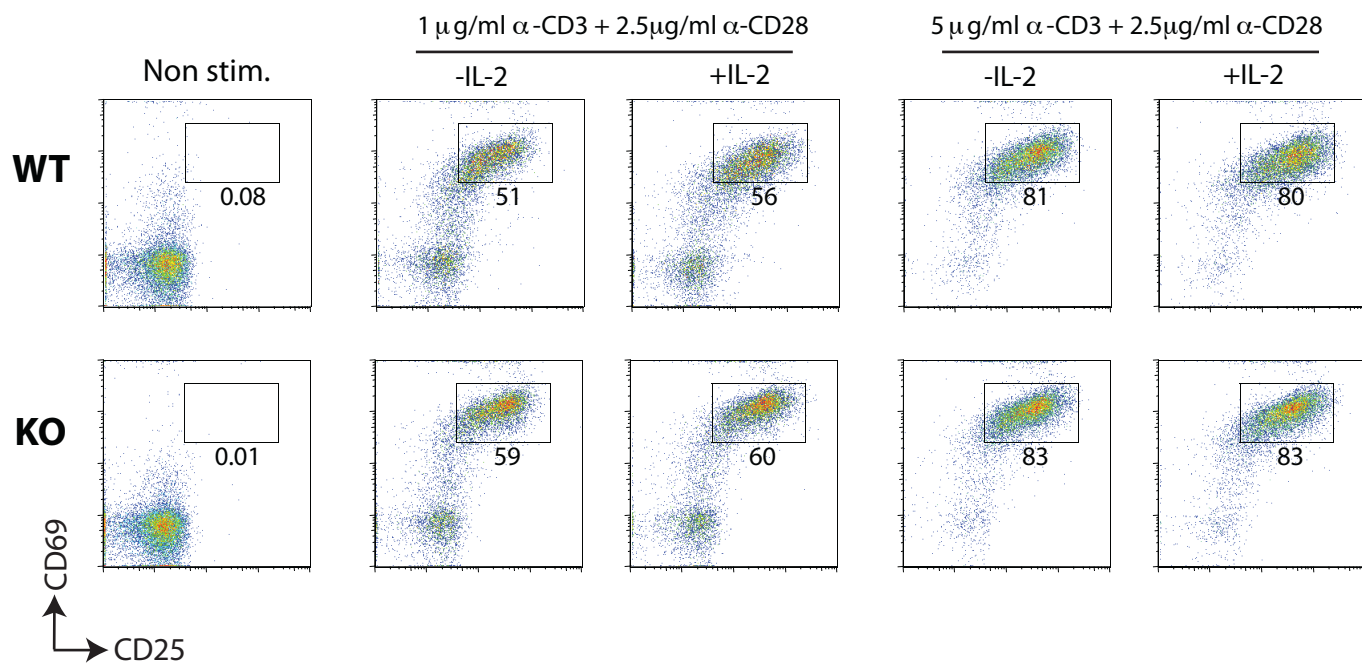

Supplement: NIHMS418320-supplement-1.pdf [file NIHMS418320-supplement-1.pdf]
